# Supplementary material
Source: PubMed Central journal article supplement (PMC3035748)

**Computational Modeling of Mg<sup>2+</sup> Binding in the Active Site of  
Protein Farnesyltransferase**

Yue Yang, Dhruva Chakravorty and Kenneth M. Merz, Jr.\*

*Department of Chemistry and the Quantum Theory Project,  
2328 New Physics Building, P.O. Box 118435, University of Florida,  
Gainesville, Florida, 32611-8435; e-mail: [merz@qtp.ufl.edu](mailto:merz@qtp.ufl.edu)*

Corresponding author:

Kenneth M. Merz, Jr.

Phone: 352-392-6973

Fax: 352-392-8722

e-mail: [merz@qtp.ufl.edu](mailto:merz@qtp.ufl.edu)

## Figure S1

Comparison of FPP<sup>3-</sup> orientation found in WT2 MD simulation and from previous FTase/FPP<sup>3-</sup> (without Mg<sup>2+</sup>) MD simulation.

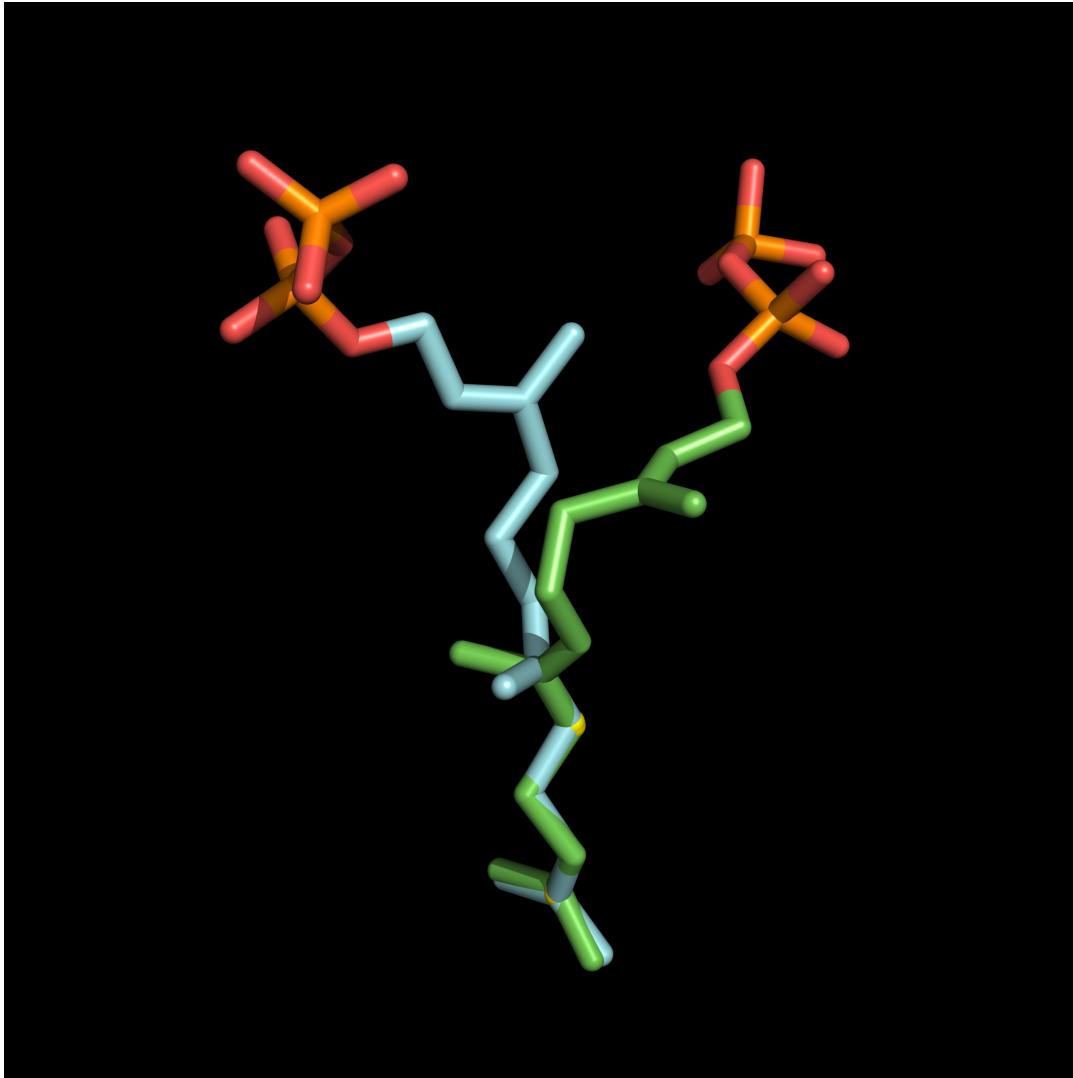

**Figure S2**

Distribution map of  $d_{RC}$  from WT2 MD simulations, in support to an intermediate state existing at  $\sim 5\text{\AA}$ .

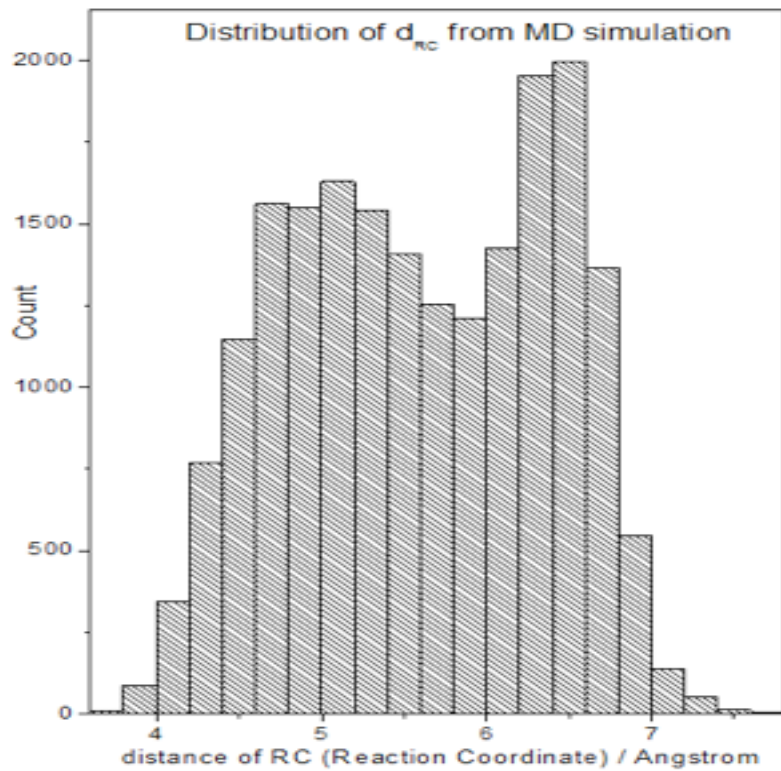

Supplement: NIHMS246307-supplement-4_si_004.pdf [file NIHMS246307-supplement-4_si_004.pdf]
